# Supplementary material for: Diagnostic Testing Accuracy for Helicobacter pylori Infection among Adult Patients with Dyspepsia in Cuba’s Primary Care Setting
Source: MDPI journal article supplement (doi:10.3390/microorganisms11040997), 2023-04-11
Supplement: s1 [file s1]

---

Communication

## Supplementary Material

# Diagnostic Testing Accuracy for *Helicobacter pylori* Infection among Adult Patients with Dyspepsia in Cuba's Primary Care Setting

Amílcar Duquesne <sup>1</sup>, Rosabel Falcón <sup>2,\*</sup>, Belkys Galindo <sup>3</sup>, Onelkis Feliciano <sup>2</sup>, Oderay Gutiérrez <sup>2</sup>, Waldemar Baldoquín <sup>3</sup>, Magile C. Fonseca <sup>4</sup>, Rafael Llanes <sup>2</sup> and Luis Sarmiento <sup>5,\*</sup>

<sup>1</sup> Teaching Orthopedical Hospital Fructuoso Rodríguez, Havana City 10400, Cuba

<sup>2</sup> Department of Microbiology, Center for Research, Diagnosis and Reference, "Pedro Kourí" Institute of Tropical Medicine, Havana City 11400, Cuba

<sup>3</sup> Department of Epidemiology, Center for Research, Diagnosis and Reference, "Pedro Kourí" Institute of Tropical Medicine, Havana City 11400, Cuba

<sup>4</sup> Department of Virology, Center for Research, Diagnosis and Reference, "Pedro Kourí" Institute of Tropical Medicine, Havana City 11400, Cuba

<sup>5</sup> Department of Clinical Sciences, Immunovirology Unit, Skåne University Hospital, Lund University, 21428 Malmö, Sweden

\* Correspondence: rosabel@ipk.sld.cu (R.F.); luis.sarmiento-perez@med.lu.se (L.S.); Tel.: +53-72553555 (R.F.); +46-703067626 (L.S.)

**Keywords:** *Helicobacter pylori*; diagnostic accuracy; primary care

**Disclaimer/Publisher's Note:** The statements, opinions and data contained in all publications are solely those of the individual author(s) and contributor(s) and not of MDPI and/or the editor(s). MDPI and/or the editor(s) disclaim responsibility for any injury to people or property resulting from any ideas, methods, instructions or products referred to in the content.

**Table S1.** STROBE Statement—Checklist of items that should be included in reports of cross-sectional studies

|                          | Item No. | Recommendation                                                                                                                                                                                      | Page No. |
|--------------------------|----------|-----------------------------------------------------------------------------------------------------------------------------------------------------------------------------------------------------|----------|
| Title and abstract       | 1        | (a) Indicate the study’s design with a commonly used term in the title or the abstract                                                                                                              | 1        |
|                          |          | (b) Provide in the abstract an informative and balanced summary of what was done and what was found                                                                                                 | 1        |
| Introduction             |          |                                                                                                                                                                                                     |          |
| Background/rationale     | 2        | Explain the scientific background and rationale for the investigation being reported                                                                                                                | 1-2      |
| Objectives               | 3        | State specific objectives, including any prespecified hypotheses                                                                                                                                    | 2        |
| Methods                  |          |                                                                                                                                                                                                     |          |
| Study design             | 4        | Present key elements of study design early in the paper                                                                                                                                             | 2        |
| Setting                  | 5        | Describe the setting, locations, and relevant dates, including periods of recruitment, exposure, follow-up, and data collection                                                                     | 2        |
| Participants             | 6        | (a) Give the eligibility criteria, and the sources and methods of selection of participants                                                                                                         | 2        |
| Variables                | 7        | Clearly define all outcomes, exposures, predictors, potential confounders, and effect modifiers. Give diagnostic criteria, if applicable                                                            | 2-4      |
| Data sources/measurement | 8*       | For each variable of interest, give sources of data and details of methods of assessment (measurement). Describe comparability of assessment methods if there is more than one group                | 3-4      |
| Bias                     | 9        | Describe any efforts to address potential sources of bias                                                                                                                                           | 3-4      |
| Study size               | 10       | Explain how the study size was arrived at                                                                                                                                                           | 4        |
| Quantitative variables   | 11       | Explain how quantitative variables were handled in the analyses. If applicable, describe which groupings were chosen and why                                                                        | -        |
| Statistical methods      | 12       | (a) Describe all statistical methods, including those used to control for confounding                                                                                                               | 4        |
|                          |          | (b) Describe any methods used to examine subgroups and interactions                                                                                                                                 | -        |
|                          |          | (c) Explain how missing data were addressed                                                                                                                                                         | -        |
|                          |          | (d) If applicable, describe analytical methods taking account of the sampling strategy                                                                                                              | -        |
|                          |          | (e) Describe any sensitivity analyses                                                                                                                                                               | -        |
| Results                  |          |                                                                                                                                                                                                     |          |
| Participants             | 13*      | (a) Report numbers of individuals at each stage of study—e.g. numbers potentially eligible, examined for eligibility, confirmed eligible, included in the study, completing follow-up, and analysed | 4        |
|                          |          | (b) Give reasons for non-participation at each stage                                                                                                                                                | 4        |
|                          |          | (c) Consider use of a flow diagram                                                                                                                                                                  | 4        |

|                          |     |                                                                                                                                                                                                              |     |
|--------------------------|-----|--------------------------------------------------------------------------------------------------------------------------------------------------------------------------------------------------------------|-----|
| Descriptive data         | 14* | (a) Give characteristics of study participants (e.g. demographic, clinical, social) and information on exposures and potential confounders                                                                   | 5   |
|                          |     | (b) Indicate the number of participants with missing data for each variable of interest                                                                                                                      | 5   |
| Outcome data             | 15* | Report numbers of outcome events or summary measures                                                                                                                                                         | 4-6 |
| Main results             | 16  | (a) Give unadjusted estimates and, if applicable, confounder-adjusted estimates and their precision (eg, 95% confidence interval). Make clear which confounders were adjusted for and why they were included | 4-6 |
| Other analyses           | 17  | Report other analyses done—e.g. analyses of subgroups and interactions, and sensitivity analyses                                                                                                             | -   |
| <b>Discussion</b>        |     |                                                                                                                                                                                                              |     |
| Key results              | 18  | Summarise key results with reference to study objectives                                                                                                                                                     | 6-8 |
| Limitations              | 19  | Discuss the limitations of the study, taking into account sources of potential bias or imprecision. Discuss both the direction and magnitude of any potential bias                                           | 7   |
| Interpretation           | 20  | Give a cautious overall interpretation of results considering objectives, limitations, multiplicity of analyses, results from similar studies, and other relevant evidence                                   | 8   |
| Generalisability         | 21  | Discuss the generalisability (external validity) of the study results                                                                                                                                        | -   |
| <b>Other information</b> |     |                                                                                                                                                                                                              |     |
| Funding                  | 22  | Give the source of funding and the role of the funders for the present study and, if applicable, for the original study on which the present article is based                                                | 8   |

**Table S2.** Report of Diagnostic Tests versus *H. pylori* status for each patient enrolled in the study.

| Patient' data |     |     | Index Diagnostic Test |                     |                                              |                 | Gold standard test                   |
|---------------|-----|-----|-----------------------|---------------------|----------------------------------------------|-----------------|--------------------------------------|
| ID            | Age | Sex | RUT <sup>a</sup>      | RT-PCR <sup>b</sup> | <i>H. pylori</i> -<br>IgG ELISA <sup>c</sup> | WB <sup>d</sup> | <i>H. pylori</i> status <sup>e</sup> |
| 1             | 58  | M   | Positive              | Positive            | Positive                                     | Positive        | Positive                             |
| 2             | 54  | F   | Negative              | Negative            | Negative                                     | Negative        | Negative                             |
| 3             | 73  | F   | Positive              | Positive            | Positive                                     | Positive        | Positive                             |
| 4             | 39  | M   | Positive              | Positive            | Positive                                     | Positive        | Positive                             |
| 5             | 36  | M   | Negative              | Positive            | Negative                                     | Negative        | Negative                             |
| 6             | 50  | M   | Positive              | Positive            | Positive                                     | Positive        | Positive                             |
| 7             | 61  | F   | Positive              | Positive            | Positive                                     | Positive        | Positive                             |
| 8             | 57  | F   | Positive              | Positive            | Positive                                     | Positive        | Positive                             |
| 9             | 50  | F   | Negative              | Positive            | Positive                                     | Positive        | Negative                             |
| 10            | 66  | M   | Negative              | Positive            | Positive                                     | Positive        | Negative                             |
| 11            | 28  | F   | Negative              | Positive            | Negative                                     | Positive        | Negative                             |
| 12            | 42  | M   | Negative              | Negative            | Negative                                     | Negative        | Negative                             |
| 13            | 45  | F   | Positive              | Positive            | Positive                                     | Positive        | Positive                             |
| 14            | 50  | F   | Positive              | Positive            | Positive                                     | Positive        | Positive                             |
| 15            | 61  | F   | Negative              | Negative            | Negative                                     | Negative        | Negative                             |
| 16            | 55  | F   | Negative              | Negative            | Positive                                     | Negative        | Negative                             |
| 17            | 47  | M   | Negative              | Positive            | Positive                                     | Positive        | Negative                             |
| 18            | 71  | F   | Positive              | Positive            | Positive                                     | Positive        | Positive                             |
| 19            | 23  | F   | Negative              | Negative            | Negative                                     | Negative        | Negative                             |
| 20            | 52  | F   | Positive              | Positive            | Positive                                     | Positive        | Positive                             |
| 21            | 68  | F   | Positive              | Positive            | Positive                                     | Positive        | Positive                             |
| 22            | 67  | F   | Negative              | Negative            | Positive                                     | Negative        | Negative                             |
| 23            | 24  | M   | Negative              | Negative            | Negative                                     | Negative        | Negative                             |
| 24            | 49  | M   | Positive              | Positive            | Positive                                     | Positive        | Positive                             |
| 25            | 43  | M   | Negative              | Negative            | Negative                                     | Negative        | Negative                             |
| 26            | 40  | F   | Positive              | Positive            | Positive                                     | Positive        | Positive                             |
| 27            | 57  | F   | Negative              | Negative            | Negative                                     | Negative        | Negative                             |
| 28            | 33  | F   | Positive              | Positive            | Positive                                     | Positive        | Positive                             |
| 29            | 53  | F   | Positive              | Positive            | Positive                                     | Positive        | Positive                             |
| 30            | 25  | M   | Negative              | Positive            | Negative                                     | Positive        | Negative                             |
| 31            | 46  | F   | Negative              | Positive            | Negative                                     | Positive        | Negative                             |
| 32            | 69  | M   | Positive              | Negative            | Positive                                     | Negative        | Positive                             |
| 33            | 18  | F   | Negative              | Negative            | Negative                                     | Negative        | Negative                             |
| 34            | 52  | M   | Negative              | Negative            | Negative                                     | Negative        | Negative                             |
| 35            | 49  | M   | Positive              | Positive            | Positive                                     | Positive        | Positive                             |
| 36            | 24  | F   | Negative              | Negative            | Positive                                     | Negative        | Negative                             |
| 37            | 59  | F   | Positive              | Negative            | Positive                                     | Positive        | Positive                             |
| 38            | 42  | M   | Positive              | Positive            | Positive                                     | Positive        | Positive                             |
| 39            | 49  | F   | Positive              | Negative            | Positive                                     | Positive        | Positive                             |

|    |    |   |          |          |          |          |          |
|----|----|---|----------|----------|----------|----------|----------|
| 40 | 67 | M | Negative | Negative | Negative | Positive | Negative |
| 41 | 19 | F | Negative | Negative | Negative | Negative | Negative |
| 42 | 60 | M | Positive | Positive | Positive | Positive | Positive |
| 43 | 25 | F | Positive | Negative | Positive | Positive | Positive |
| 44 | 42 | F | Positive | Negative | Positive | Positive | Positive |
| 45 | 55 | F | Positive | Negative | Positive | Positive | Positive |
| 46 | 52 | F | Positive | Negative | Positive | Negative | Positive |
| 47 | 48 | M | Negative | Negative | Positive | Negative | Negative |
| 48 | 50 | M | Negative | Negative | Negative | Negative | Negative |
| 49 | 47 | M | Positive | Positive | Positive | Positive | Positive |
| 50 | 36 | F | Negative | Negative | Negative | Negative | Negative |
| 51 | 65 | M | Positive | Negative | Positive | Positive | Positive |
| 52 | 76 | F | Negative | Negative | Positive | Negative | Negative |
| 53 | 47 | F | Positive | Negative | Positive | Positive | Positive |
| 54 | 72 | M | Negative | Negative | Negative | Negative | Negative |
| 55 | 67 | M | Positive | Negative | Positive | Negative | Positive |
| 56 | 36 | F | Negative | Negative | Positive | Negative | Negative |
| 57 | 37 | F | Negative | Negative | Negative | Positive | Negative |
| 58 | 36 | M | Positive | Negative | Negative | Negative | Positive |
| 59 | 49 | M | Negative | Negative | Negative | Negative | Negative |
| 60 | 44 | F | Positive | Positive | Positive | Positive | Positive |
| 61 | 41 | F | Negative | Negative | Negative | Negative | Negative |
| 62 | 59 | M | Positive | Positive | Positive | Positive | Positive |
| 63 | 57 | F | Negative | Negative | Negative | Negative | Negative |
| 64 | 20 | M | Negative | Negative | Negative | Negative | Negative |
| 65 | 71 | F | Negative | Negative | Negative | Negative | Negative |
| 66 | 59 | M | Negative | Negative | Positive | Negative | Negative |
| 67 | 67 | F | Positive | Positive | Positive | Positive | Positive |
| 68 | 36 | F | Negative | Negative | Positive | Negative | Negative |
| 69 | 39 | M | Negative | Negative | Negative | Negative | Negative |
| 70 | 31 | M | Positive | Positive | Positive | Positive | Positive |
| 71 | 62 | F | Negative | Negative | Positive | Negative | Negative |
| 72 | 76 | F | Positive | Positive | Positive | Positive | Positive |
| 73 | 44 | F | Negative | Positive | Negative | Positive | Negative |
| 74 | 41 | F | Negative | Negative | Negative | Negative | Negative |
| 75 | 25 | F | Negative | Negative | Negative | Negative | Negative |
| 76 | 35 | M | Positive | Positive | Positive | Positive | Positive |
| 77 | 62 | M | Positive | Positive | Positive | Positive | Positive |
| 78 | 54 | F | Positive | Positive | Positive | Positive | Positive |
| 79 | 28 | M | Positive | Positive | Positive | Positive | Positive |
| 80 | 29 | F | Negative | Positive | Negative | Positive | Negative |
| 81 | 47 | F | Negative | Positive | Positive | Positive | Negative |
| 82 | 82 | F | Positive | Positive | Positive | Positive | Positive |

|    |    |   |          |          |          |          |          |
|----|----|---|----------|----------|----------|----------|----------|
| 83 | 57 | F | Positive | Positive | Positive | Positive | Positive |
| 84 | 69 | F | Positive | Positive | Positive | Positive | Positive |
| 85 | 50 | F | Positive | Positive | Positive | Positive | Positive |
| 86 | 55 | F | Negative | Positive | Negative | Positive | Negative |
| 87 | 51 | M | Positive | Positive | Positive | Positive | Positive |
| 88 | 73 | F | Negative | Positive | Negative | Positive | Negative |
| 89 | 26 | F | Negative | Negative | Negative | Negative | Negative |
| 90 | 55 | F | Positive | Positive | Positive | Negative | Positive |
| 91 | 55 | F | Negative | Positive | Negative | Positive | Negative |
| 92 | 64 | M | Positive | Positive | Positive | Positive | Positive |

### Legend and specifications

Sex was expressed as Female (F) and Male (M) gender.

RUT: Rapid Urease Test; RT-PCR: Real-time polymerase chain reaction; WB: Western blotting Helicoblot 2.1.

H. pylori status was defined by histopathology (standard histological examination with Hematoxylin-eosin & Giemsa staining) and culture: bacterial culture using Columbia agar plates in microaerophilic conditions [Llanes et al., 2014].

### References

- <sup>a</sup>Dolak, W.; Bilgiler, C.; Stadlmann, A.; Leiner, J.; Püspök, A.; Plieschnegger, W.; Siebert, F.; Wewalka, F.; Schöfl, R.; Huber-Schönauer, U.; Datz, C.; Biowski-Frotz, S.; Högenauer, C.; Schrutka-Kölbl, C.; Makristathis, A.; Schöniger-Hekle, M.; Steininger, C.; Austrian Helicobacter pylori Study Group. A multicenter prospective study on the diagnostic performance of a new liquid rapid urease test for the diagnosis of Helicobacter pylori infection. Gut pathogens 2017, 9, 78. <https://doi.org/10.1186/s13099-017-0226-5>
- <sup>b</sup>Hays, C.; Delerue, T.; Lamarque, D.; Burucoa, C.; Collobert, G.; Billöt, A.; Kalach, N.; Raymond, J. Molecular diagnosis of Helicobacter pylori infection in gastric biopsies: Evaluation of the Amplidiag® H. pylori + ClariR assay. Helicobacter 2019, 24, e12560. <https://doi.org/10.1111/hel.12560>
- <sup>c</sup>Corrales R. Ensayo inmunoenzimático para la detección de anticuerpos IgG contra Helicobacter pylori. Master's thesis, Postgraduate Center of Pedro Kourí Tropical Medicine Institute - School of Medicine of the University of Havana, 2016
- <sup>d</sup>Veijola, L.; Oksanen, A.; Sipponen, P.; Rautelin, H. Evaluation of a commercial immunoblot, Helicoblot 2.1 for diagnosis of Helicobacter pylori infection. Clin Vaccine Immunol 2008, 15, 1705-10. <https://doi.org/10.1128/CVI.00165-08>
- <sup>e</sup>Llanes, R.; Feliciano, O.; Gutiérrez, O.; Gala, A.; Valdés, L.; Capó, V.; Llop, A.; Millán, L.; Rodríguez, A. Nuevos conocimientos sobre el diagnóstico y la resistencia antimicrobiana de Helicobacter pylori en Cuba. Rev Ann Acad Cienc Cuba 2014, 4, 1-9. <http://www.revistaccuba.cu> ISSN:2304-0106

**Table S3.** Statistical measures for diagnostic accuracy assessment of index tests using Epidat 3.1 program

| RUT test        | <i>H. pylori</i> status (reference standard) |    |                |    |       |
|-----------------|----------------------------------------------|----|----------------|----|-------|
|                 | Present                                      | n  | Absent         | n  | Total |
| <b>Positive</b> | True Positive                                | 46 | False Positive | 0  | 46    |
| <b>Negative</b> | False Negative                               | 0  | True Negative  | 46 | 46    |
| <b>Total</b>    |                                              | 46 |                | 46 | 92    |

**Results**

| Statistic parameter       | Value | 95% Confidence Interval |
|---------------------------|-------|-------------------------|
| Sensitivity               | 98.9% | 90.5-99.9               |
| Specificity               | 98.9% | 90.3-99.9               |
| Positive Predictive Value | 98.9% | 90.5-99.9               |
| Negative Predictive Value | 98.9% | 90.3-99.9               |
| Positive Likelihood Ratio | 92.0  | 5.7-1417.7              |
| Negative Likelihood Ratio | 0.01  | 0.0-0.2                 |
| Accuracy                  | 98.9% | 94.1-99.8               |
| Youden index              | 1.0   |                         |
| Kappa                     | 0.98  |                         |

| RT-PCR<br>test  | <i>H. pylori</i> status (reference standard) |    |                |    |       |
|-----------------|----------------------------------------------|----|----------------|----|-------|
|                 | Present                                      | n  | Absent         | n  | Total |
| <b>Positive</b> | True Positive                                | 35 | False Positive | 13 | 48    |
| <b>Negative</b> | False Negative                               | 11 | True Negative  | 33 | 44    |
| <b>Total</b>    |                                              | 46 |                | 46 | 92    |

## Results

| Statistic parameter       | Value | 95% Confidence Interval |
|---------------------------|-------|-------------------------|
| Sensitivity               | 76.1% | 62.1-86.1               |
| Specificity               | 71.7% | 57.5-82.7               |
| Positive Predictive Value | 72.9% | 59.0-84.7               |
| Negative Predictive Value | 75.0% | 60.6-85.4               |
| Positive Likelihood Ratio | 2.7   | 1.7-4.4                 |
| Negative Likelihood Ratio | 0.3   | 0.2-0.6                 |
| Accuracy                  | 73.9% | 64.1-81.8               |
| Youden index              | 0.5   |                         |
| Kappa                     | 0.48  |                         |



| <i>H. pylori</i> -<br>IgG<br>ELISA<br>test | <i>H. pylori</i> status (reference standard) |    |                |    |       |
|--------------------------------------------|----------------------------------------------|----|----------------|----|-------|
|                                            | Present                                      | n  | Absent         | n  | Total |
| <b>Positive</b>                            | True Positive                                | 45 | False Positive | 13 | 58    |
| <b>Negative</b>                            | False Negative                               | 1  | True Negative  | 33 | 34    |
| <b>Total</b>                               |                                              | 46 |                | 46 | 92    |

## Results

| Statistic parameter       | Value | 95% Confidence Interval |
|---------------------------|-------|-------------------------|
| Sensitivity               | 97.8% | 88.4-99.6               |
| Specificity               | 71.1% | 56.6-82.3               |
| Positive Predictive Value | 77.2% | 64.8-86.2               |
| Negative Predictive Value | 97.1% | 84.7-99.5               |
| Positive Likelihood Ratio | 3.4   | 2.1-5.4                 |
| Negative Likelihood Ratio | 0.03  | 0.0-0.2                 |
| Accuracy                  | 84.4% | 75.6-90.5               |
| Youden index              | 0.7   |                         |
| Kappa                     | 0.65  |                         |

| WB test         | <i>H. pylori</i> status (reference standard) |    |                |    |       |
|-----------------|----------------------------------------------|----|----------------|----|-------|
|                 | Present                                      | N  | Absent         | n  | Total |
| <b>Positive</b> | True Positive                                | 41 | False Positive | 14 | 55    |
| <b>Negative</b> | False Negative                               | 5  | True Negative  | 32 | 37    |
| <b>Total</b>    |                                              | 46 |                | 46 | 92    |

## Results

| Statistic parameter       | Value | 95% Confidence Interval |
|---------------------------|-------|-------------------------|
| Sensitivity               | 89.4% | 77.4-95.4               |
| Specificity               | 68.9% | 54.3-80.5               |
| Positive Predictive Value | 75.0% | 62.3-84.5               |
| Negative Predictive Value | 86.1% | 71.3-93.9               |
| Positive Likelihood Ratio | 2.9   | 1.8-4.5                 |
| Negative Likelihood Ratio | 0.2   | 0.1-0.4                 |
| Accuracy                  | 79.3% | 70.0-86.4               |
| Youden index              | 0.6   |                         |
| Kappa                     | 0.58  |                         |

**Definitions and Formulation of major accuracy diagnostic parameters****Sensitivity**

|                                                        |                                                   |
|--------------------------------------------------------|---------------------------------------------------|
| The proportion of true positives in diseased subjects. | True positives/(true positives + false negatives) |
|--------------------------------------------------------|---------------------------------------------------|

**Specificity**

|                                                            |                                                   |
|------------------------------------------------------------|---------------------------------------------------|
| The proportion of true negatives in non-diseased subjects. | True negatives/(true negatives + false positives) |
|------------------------------------------------------------|---------------------------------------------------|

**Positive predictive value**

|                                                           |                                                   |
|-----------------------------------------------------------|---------------------------------------------------|
| The proportion of diseased subjects out of all positives. | True positives/(true positives + false positives) |
|-----------------------------------------------------------|---------------------------------------------------|

**Negative predictive value**

|                                                              |                                                   |
|--------------------------------------------------------------|---------------------------------------------------|
| The proportion of non-diseased subjects out of all negatives | True negatives/(true negatives + false negatives) |
|--------------------------------------------------------------|---------------------------------------------------|

**Positive likelihood ratio**

|                                                                            |                               |
|----------------------------------------------------------------------------|-------------------------------|
| The ratio of the probability of positive test in diseased to non-diseased. | Sensitivity / (1-Specificity) |
|----------------------------------------------------------------------------|-------------------------------|

**Negative likelihood ratio**

|                                                                           |                                |
|---------------------------------------------------------------------------|--------------------------------|
| The ratio of the probability of negative test in diseased to non-diseased | (1-Sensitivity) / Specificity) |
|---------------------------------------------------------------------------|--------------------------------|

**Accuracy**

|                                                                               |                                                                                                         |
|-------------------------------------------------------------------------------|---------------------------------------------------------------------------------------------------------|
| Overall probability that a patient is correctly classified among all subjects | (True positives + true negatives)/ (True positives + true negatives+ false positives + false negatives) |
|-------------------------------------------------------------------------------|---------------------------------------------------------------------------------------------------------|

**Youden Index**

|                                                                                                                                                        |                                 |
|--------------------------------------------------------------------------------------------------------------------------------------------------------|---------------------------------|
| This index integrates sensitivity and specificity information under circumstances that emphasize both parameters, with a value that ranges from 0 to 1 | (Sensitivity + Specificity – 1) |
|--------------------------------------------------------------------------------------------------------------------------------------------------------|---------------------------------|

**Confidence intervals**

|                                                                                                                                                                   |                                                                                                                                                                         |
|-------------------------------------------------------------------------------------------------------------------------------------------------------------------|-------------------------------------------------------------------------------------------------------------------------------------------------------------------------|
| The probability that, given a predetermined confidence level, the expected results to fall within a range of expected values if you conduct the experiment again. | $CI = \bar{x} \pm z \frac{s}{\sqrt{n}}$ <p> <math>\bar{x}</math>- sample mean<br/> z -confidence level value<br/> s- sample standard deviation<br/> n- sample size </p> |
|-------------------------------------------------------------------------------------------------------------------------------------------------------------------|-------------------------------------------------------------------------------------------------------------------------------------------------------------------------|

Sensitivity, specificity, disease prevalence, positive and negative predictive value as well as accuracy are expressed as percentages.

**References**

- Akoglu H. User's guide to sample size estimation in diagnostic accuracy studies. Turk J Emerg Med 2022, 22:177-85. <https://doi.org/10.4103/2452-2473.357348>
- Šimundić A.M. Measures of diagnostic accuracy: basic definitions. Electron J Int Fed Clin Chem Lab Med 2009, 19:203-2011 PMID: 27683318

Canbek, G., Taskaya Temizel, T. &Sagiroglu, S. PToPI: A comprehensive review, analysis, and knowledge representation of binary classification performance measures/metrics. *SN Comput Sci* 2023, 4, 13. <https://doi.org/10.1007/S42979-022-01409-1>
